# Supplementary material
Source: publisher site journal article supplement (https://www.dovepress.com/article/583575)
Supplement: Supplementary file 1 [file 583575%20Revised%20Supplementary%20Material_1.docx]

| **Supplemental Table S1 Primer sequence** | |
| --- | --- |
| Primer name | Sequence (5-3) |
| mouse GAPDH F | TGCCCCCATGTTTGTGATG |
| mouse GAPDH R | TGTGGTCATGAGCCCTTCC |
| mouse NAAA F | GCAGCATCTGTGACTCGCTCAA |
| mouse NAAA R | CCAAAAGGATAGTCCAGGTTCCG |
| mouse PPARGC1A F | GAATCAAGCCACTACAGACACCG |
| mouse PPARGC1A R | CATCCCTCTTGAGCCTTTCGTG |
| mouse GIPC2 F | CTCTGAAGCCAAGGCAAAGGCA |
| mouse GIPC2 R | GTCTCGTCAAGAGCGACAGCAA |

| **Supplemental Table S2 Results of MR randomization analysis for different exposure factors** | | | | | | | | |
| --- | --- | --- | --- | --- | --- | --- | --- | --- |
| Gene | method | nsnp | b | p | p_bonferroni | p_bh | Q | Q_pval |
| PPARGC1A | Inverse variance weighted | 4 | -0.001 | 0.016 | 1 | 0.96 | 0.49 | 0.92 |
| PADI2 | Inverse variance weighted | 7 | 0.001 | 0.042 | 1 | 0.99 | 2.82 | 0.83 |
| TEX11 | Inverse variance weighted | 3 | -0.001 | 0.033 | 1 | 0.99 | 1.58 | 0.45 |
| TST | Inverse variance weighted | 8 | 0.001 | 0.009 | 1 | 0.96 | 4.71 | 0.70 |
| SEC14L1 | Inverse variance weighted | 3 | -0.001 | 0.033 | 1 | 0.99 | 1.58 | 0.45 |
| GIPC2 | Inverse variance weighted | 4 | -0.001 | 0.016 | 1 | 0.96 | 0.49 | 0.92 |
| NAAA | Inverse variance weighted | 6 | 0 | 0.039 | 1 | 0.99 | 2.09 | 0.84 |
| SLC16A9 | Inverse variance weighted | 7 | 0.001 | 0.042 | 1 | 0.99 | 2.82 | 0.83 |
| SERPINA6 | Inverse variance weighted | 4 | -0.001 | 0.016 | 1 | 0.96 | 0.49 | 0.92 |
| SERPINA6 | Inverse variance weighted | 4 | -0.001 | 0.016 | 1 | 0.96 | 0.49 | 0.92 |

| **Supplemental Table S3 Calculation of Cochran's Q statistic based on MRE-IVW and MR Egger regression methods** | | | | |
| --- | --- | --- | --- | --- |
| id.exposure | id.outcome | method | Q | Q_pval |
| eqtl-a-ENSG00000109819 | GCST90038684 | MR Egger | 0.491 | 0.782 |
| eqtl-a-ENSG00000109819 | GCST90038684 | Inverse variance weighted | 0.493 | 0.92 |
| eqtl-a-ENSG00000117115 | GCST90038684 | MR Egger | 1.173 | 0.947 |
| eqtl-a-ENSG00000117115 | GCST90038684 | Inverse variance weighted | 2.822 | 0.831 |
| eqtl-a-ENSG00000120498 | GCST90038684 | MR Egger | 0 | 0.998 |
| eqtl-a-ENSG00000120498 | GCST90038684 | Inverse variance weighted | 1.584 | 0.453 |
| eqtl-a-ENSG00000128311 | GCST90038684 | MR Egger | 4.322 | 0.633 |
| eqtl-a-ENSG00000128311 | GCST90038684 | Inverse variance weighted | 4.711 | 0.695 |
| eqtl-a-ENSG00000129657 | GCST90038684 | MR Egger | 0 | 0.998 |
| eqtl-a-ENSG00000129657 | GCST90038684 | Inverse variance weighted | 1.584 | 0.453 |
| eqtl-a-ENSG00000137960 | GCST90038684 | MR Egger | 0.491 | 0.782 |
| eqtl-a-ENSG00000137960 | GCST90038684 | Inverse variance weighted | 0.493 | 0.92 |
| eqtl-a-ENSG00000138744 | GCST90038684 | MR Egger | 2.024 | 0.731 |
| eqtl-a-ENSG00000138744 | GCST90038684 | Inverse variance weighted | 2.087 | 0.837 |
| eqtl-a-ENSG00000165449 | GCST90038684 | MR Egger | 1.173 | 0.947 |
| eqtl-a-ENSG00000165449 | GCST90038684 | Inverse variance weighted | 2.822 | 0.831 |
| eqtl-a-ENSG00000170099 | GCST90038684 | MR Egger | 0.491 | 0.782 |
| eqtl-a-ENSG00000170099 | GCST90038684 | Inverse variance weighted | 0.493 | 0.92 |
| eqtl-a-ENSG00000277405 | GCST90038684 | MR Egger | 0.491 | 0.782 |
| eqtl-a-ENSG00000277405 | GCST90038684 | Inverse variance weighted | 0.493 | 0.92 |

| **Supplemental Table S4 Multi efficacy analysis - Ulcerative colitis** | | | | | |
| --- | --- | --- | --- | --- | --- |
| id.exposure | id.outcome | egger_intercept | se | PRESSO_P | RSSobs |
| eqtl-a-ENSG00000109819 | GCST90038684 | 0 | 0.0003 | 0.946 | 0.703 |
| eqtl-a-ENSG00000117115 | GCST90038684 | 0.0002 | 0.0001 | 0.861 | 3.529 |
| eqtl-a-ENSG00000120498 | GCST90038684 | -0.0002 | 0.0002 | 0.64 | 4.261 |
| eqtl-a-ENSG00000128311 | GCST90038684 | 0.0001 | 0.0001 | 0.597 | 7.735 |
| eqtl-a-ENSG00000129657 | GCST90038684 | -0.0002 | 0.0002 | 0.642 | 4.261 |
| eqtl-a-ENSG00000137960 | GCST90038684 | 0 | 0.0003 | 0.942 | 0.703 |
| eqtl-a-ENSG00000138744 | GCST90038684 | 0 | 0.0002 | 0.838 | 3.086 |
| eqtl-a-ENSG00000165449 | GCST90038684 | 0.0002 | 0.0001 | 0.859 | 3.529 |
| eqtl-a-ENSG00000170099 | GCST90038684 | 0 | 0.0003 | 0.947 | 0.703 |
| eqtl-a-ENSG00000277405 | GCST90038684 | 0 | 0.0003 | 0.952 | 0.703 |

| **Supplemental Table S5 Directional analysis** | | | | |
| --- | --- | --- | --- | --- |
| id.exposure | snp_r2.exposure | snp_r2.outcome | correct_causal_direction | steiger_pval |
| eqtl-a-ENSG00000109819 | 0.046514965 | 0.0000131 | TRUE | 1.67E-301 |
| eqtl-a-ENSG00000117115 | 0.065319331 | 0.0000141 | TRUE | 0 |
| eqtl-a-ENSG00000120498 | 0.015879572 | 0.0000126 | TRUE | 3.82E-97 |
| eqtl-a-ENSG00000128311 | 0.047845569 | 0.0000239 | TRUE | 3.61E-287 |
| eqtl-a-ENSG00000129657 | 0.015879572 | 0.0000126 | TRUE | 3.82E-97 |
| eqtl-a-ENSG00000137960 | 0.046514965 | 0.0000131 | TRUE | 1.67E-301 |
| eqtl-a-ENSG00000138744 | 0.124056771 | 0.0000125 | TRUE | 0 |
| eqtl-a-ENSG00000165449 | 0.065319331 | 0.0000141 | TRUE | 0 |
| eqtl-a-ENSG00000170099 | 0.046514965 | 0.0000131 | TRUE | 1.67E-301 |
| eqtl-a-ENSG00000277405 | 0.046514965 | 0.0000131 | TRUE | 1.67E-301 |

| **Supplemental Table S6 The co-localization analysis results** | | | | | | |
| --- | --- | --- | --- | --- | --- | --- |
| PP.H0.abf | PP.H1.abf | PP.H2.abf | PP.H3.abf | PP.H4.abf | gene_symbol | n_snps |
| 0 | 0.991699931100092 | 0 | 0.00803171316870844 | 0.000268355731226628 | PPARGC1A | 990 |
| 0 | 0.996735392975198 | 0 | 0.00313270934211504 | 0.00013189768297445 | PADI2 | 1646 |
| 1.02659967348706e-141 | 0.999193871714716 | 6.82197112681531e-145 | 0.000663843094794616 | 0.000142285190500986 | TST | 689 |
| 2.57510809373688e-73 | 0.999648560201703 | 4.31261508881451e-77 | 0.000167230100976579 | 0.000184209697325995 | SEC14L1 | 361 |
| 0.461901585395819 | 0.537924067113357 | 3.26699897655616e-06 | 3.63725766377632e-06 | 0.000167443234182909 | GIPC2 | 22 |
| 0 | 0.99717482848404 | 0 | 0.00146872105714711 | 0.00135645045891578 | NAAA | 3439 |
| 4.23689695061763e-13 | 0.999904335006275 | 2.67226498343064e-18 | 6.21707634445605e-06 | 8.94479169571504e-05 | SLC16A9 | 64 |
| 0.137660393798175 | 0.862257218889621 | 5.42017076455843e-07 | 3.31647917465887e-06 | 7.85288159523869e-05 | SERPINA6 | 40 |

| **Supplemental Table S7 The binding energy between key genes and three active compounds** | | | |
| --- | --- | --- | --- |
| Targets | PDB ID | DrugName | Docking score（kcal/mol） |
| PPARGC1A | 6W9L | Resveratrol | -8.1 |
|  |  | Rosiglitazone | -8.5 |
|  |  | Rotenone | -7.9 |
| GIPC2 | 3GGE | Benzo(a)pyrene | -8.3 |
|  |  | bisphenol A | -6.8 |
|  |  | Tetrachlorodibenzodioxin | -6.4 |


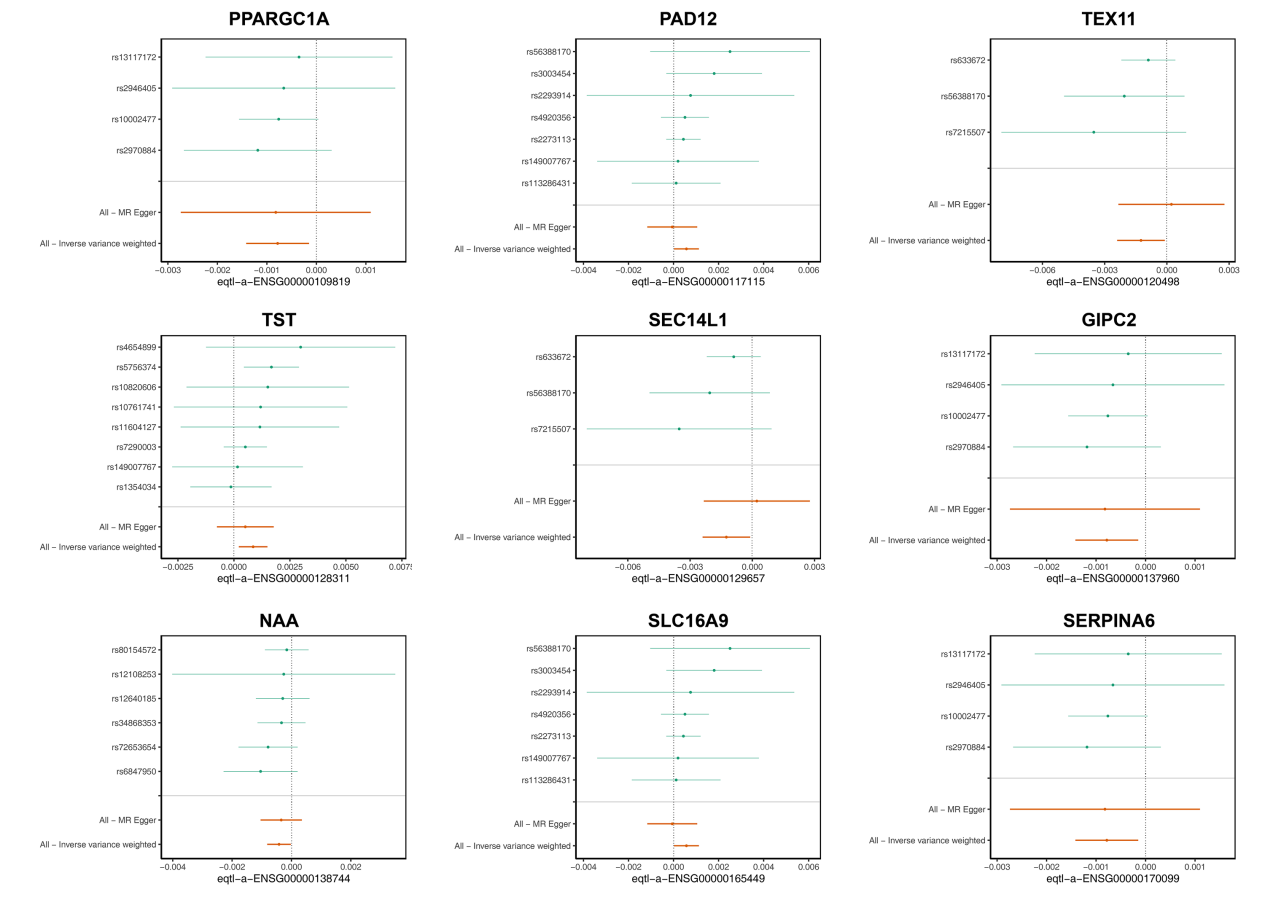


Supplemental Fig. S1 Forest plot of Mendelian randomization analysis for 9 gene (PPARGC1A, PAD12, TEX11, TST, SEC14L1, GIPC2, NAA, SLC16A9, and SERPINA6) present the MR estimate for each SNP.


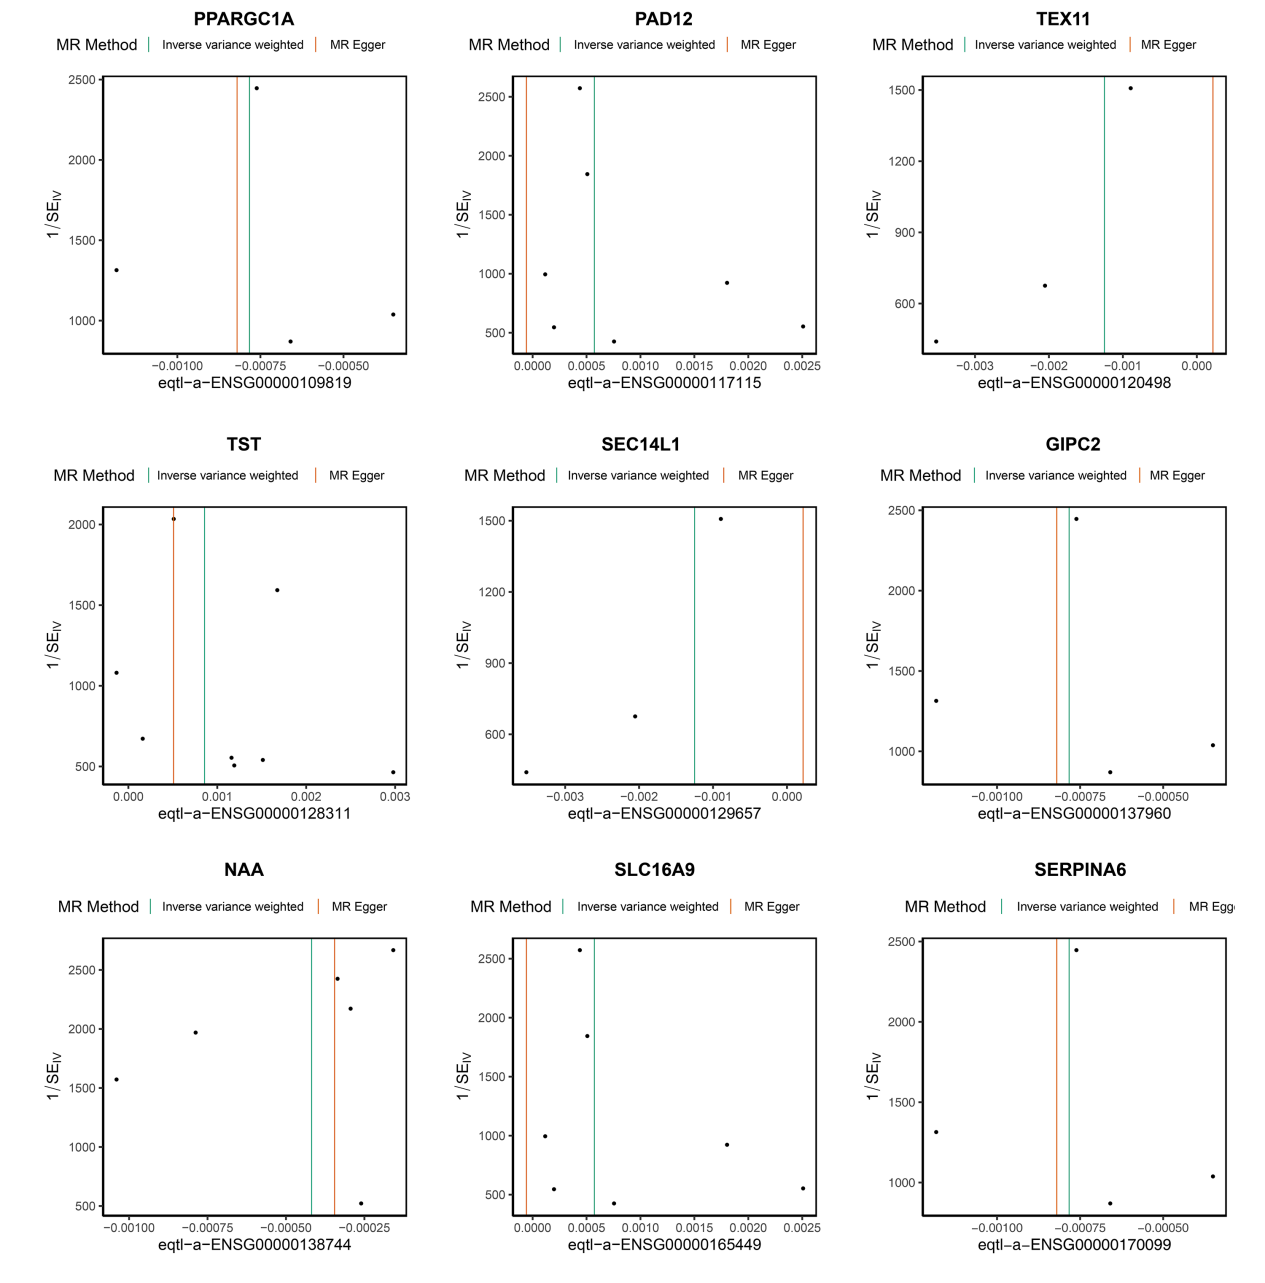


Supplemental Fig. S2 The Funnel plot employed to evaluate the presence of potential heterogeneity in the observed association.


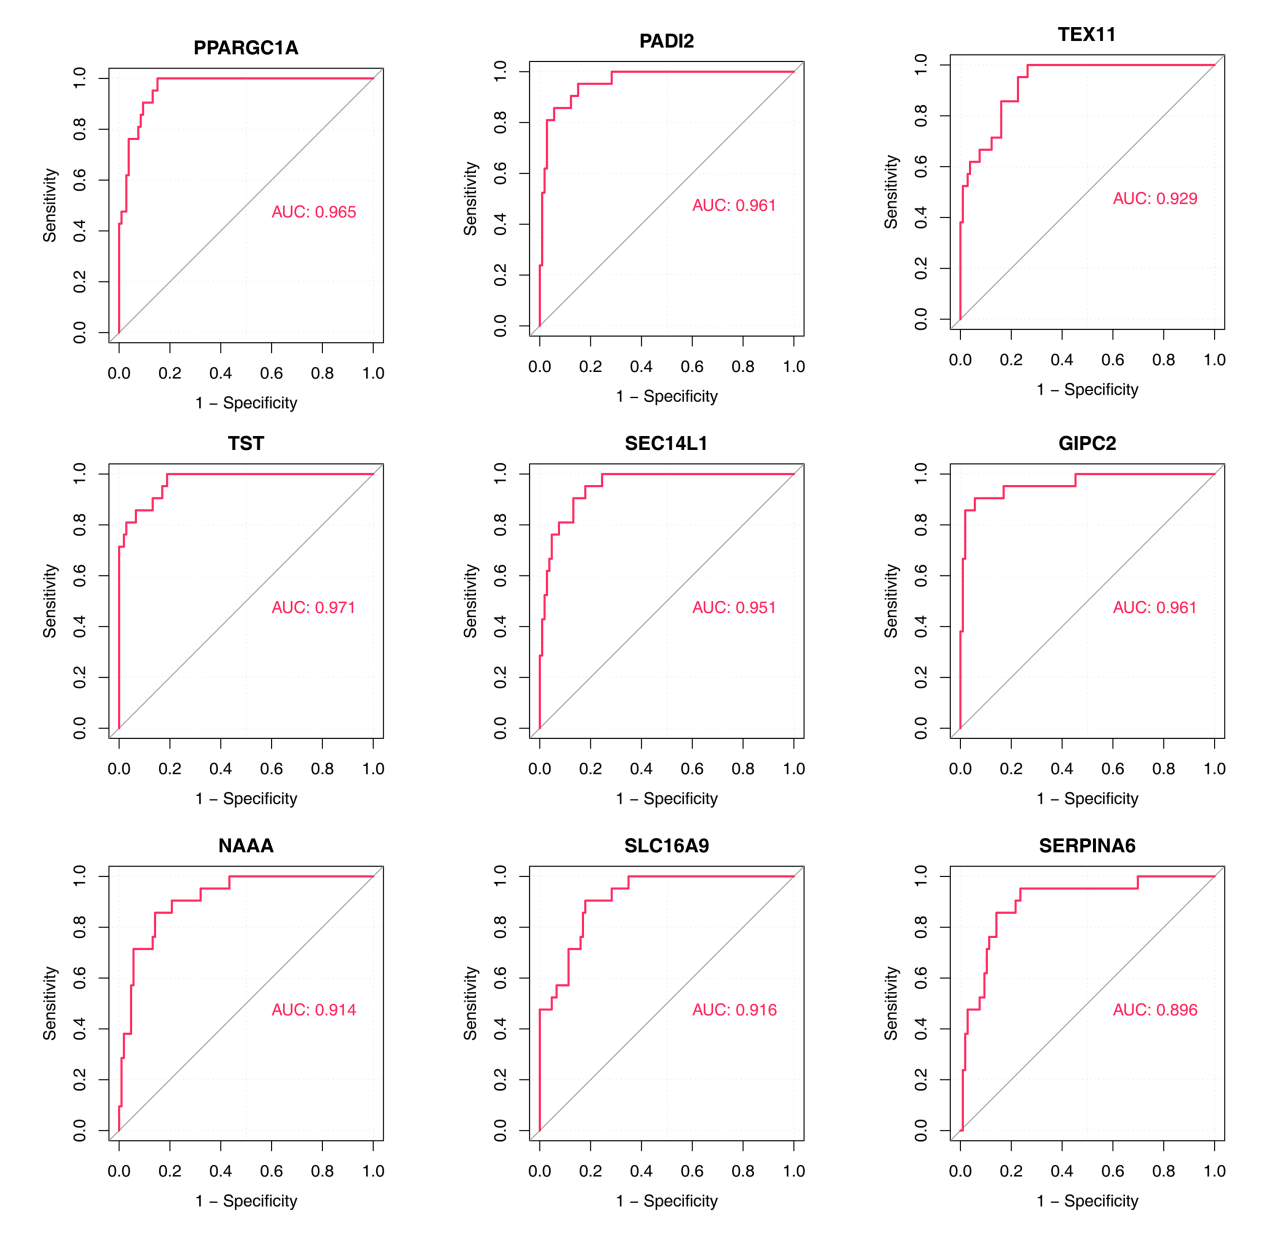


Supplemental Fig. S3 The ROC curve drawn for explore the diagnostic value of the candidate key genes(PPARGC1A, PAD12, TEX11, TST, SEC14L1, GIPC2, NAA, SLC16A9, and SERPINA6). ROC, receiver operating characteristic curve. AUC, area under the receiver operating characteristic curve.


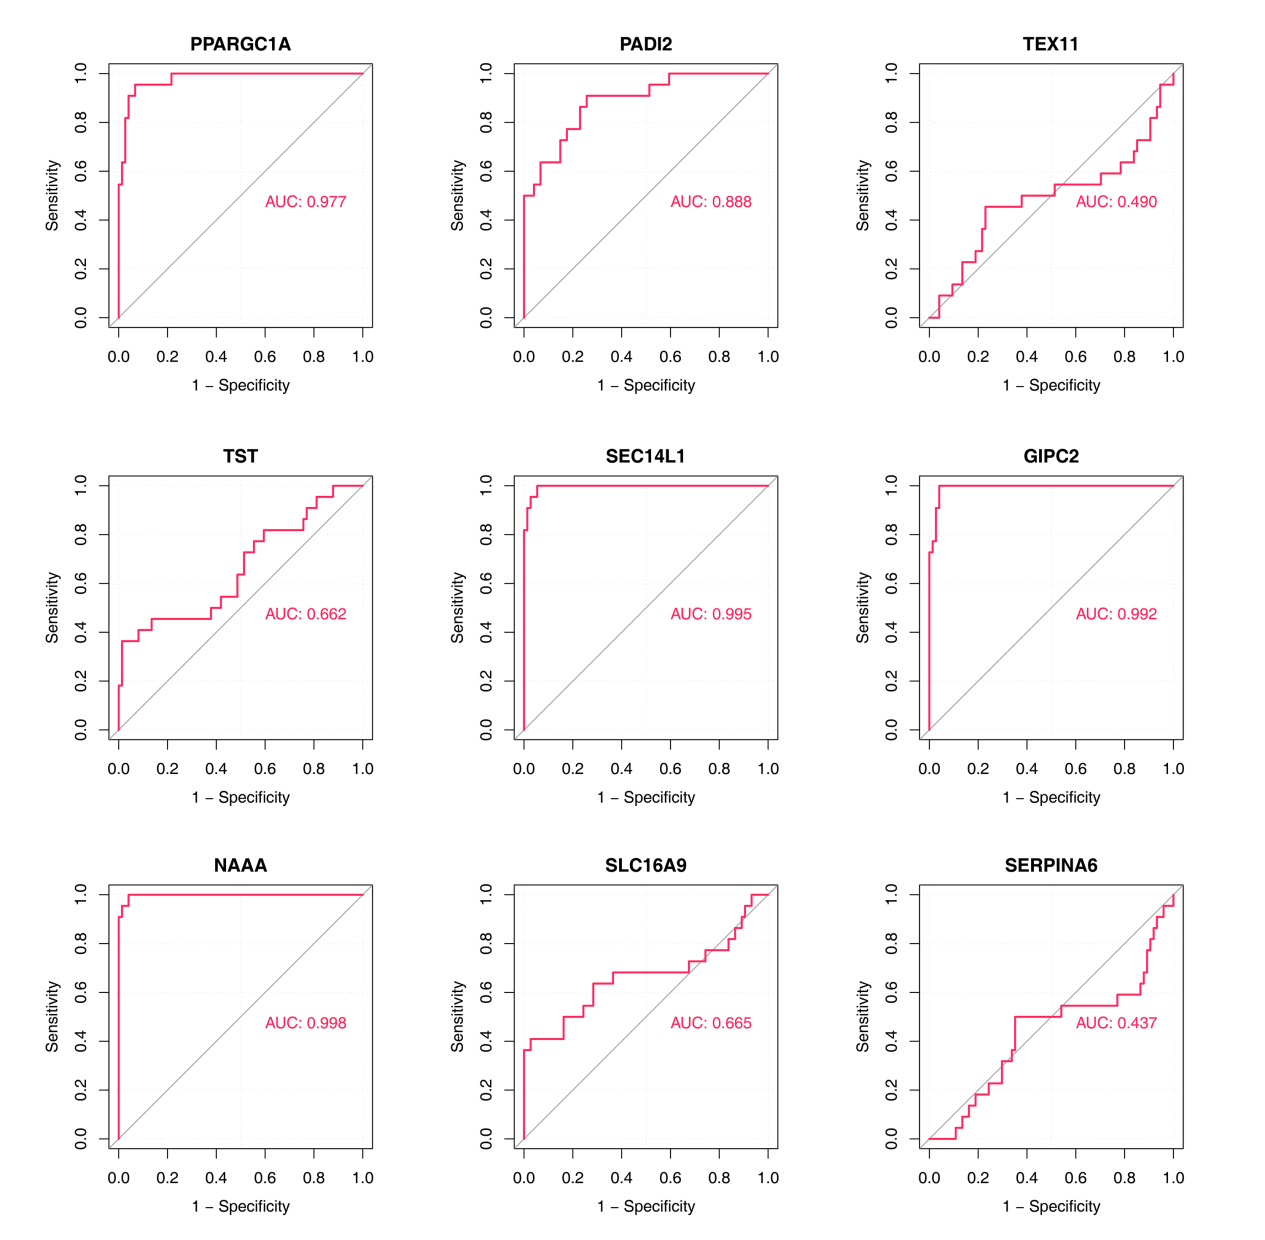


Supplemental Fig. S4 The ROC curve drawn for explore the diagnostic value of the candidate key genes(PPARGC1A, PAD12, TEX11, TST, SEC14L1, GIPC2, NAA, SLC16A9, and SERPINA6). ROC, receiver operating characteristic curve. AUC, area under the receiver operating characteristic curve.


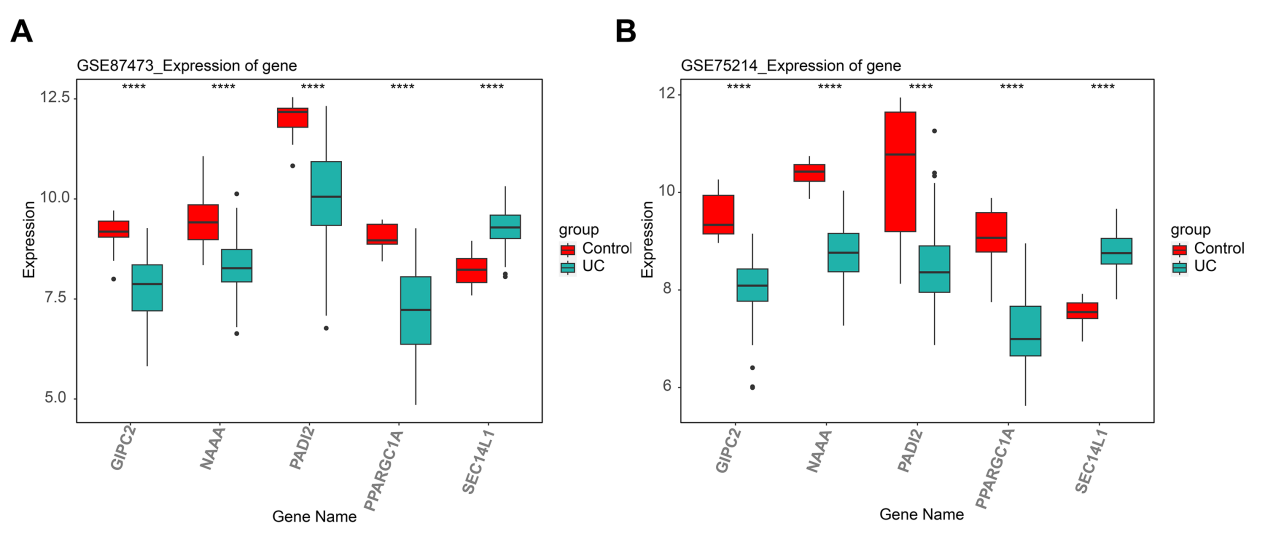


Supplemental Fig. S5 Expression of biomarkers in the validation set shows significant differences gene between the UC group and the control group.


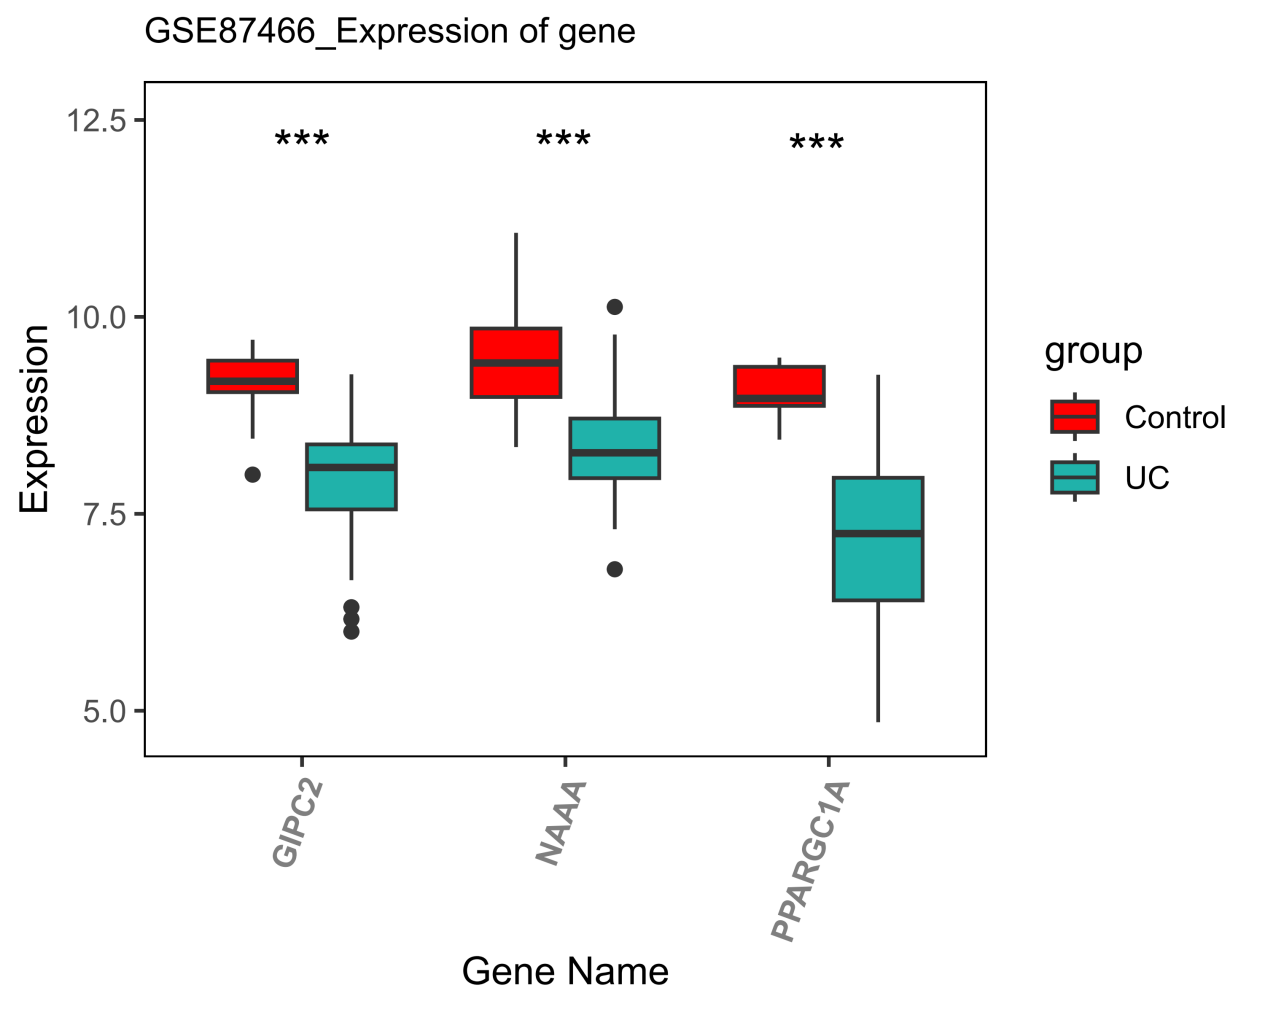


Supplemental Fig. S6 Expression of biomarkers in the GSE87466 set shows significant differences gene between the UC group and the control group.
